# Supplementary material for: Web-Based Personalized Nutrition System for Delivering Dietary Feedback Based on Behavior Change Techniques: Development and Pilot Study among Dietitians
Source: MDPI journal article supplement (doi:10.3390/nu13103391), 2021-09-27
Supplement: s1 [file s1]

**Table S1.** List of food groups and food items estimated from the Meal-based Diet History Questionnaire.

| <b>Food group</b>         | <b>Food item</b>                                                                                                                                                                                                                                              |
|---------------------------|---------------------------------------------------------------------------------------------------------------------------------------------------------------------------------------------------------------------------------------------------------------|
| Rice                      | White rice; brown rice                                                                                                                                                                                                                                        |
| Bread                     | NA                                                                                                                                                                                                                                                            |
| Noodles                   | Wheat noodles; Chinese noodles; instant noodles; spaghetti; buckwheat noodles                                                                                                                                                                                 |
| Breakfast cereals         | NA                                                                                                                                                                                                                                                            |
| Miso soup                 | NA                                                                                                                                                                                                                                                            |
| Pickled vegetables        | NA                                                                                                                                                                                                                                                            |
| Meat                      | Liver; processed meat; beef; chicken; pork                                                                                                                                                                                                                    |
| Fish and shellfish        | Small fish with bones; dried fish; canned tuna; salmon; white meat fish; oily fish; red meat fish; squid and octopus; eel; shrimp and crab; shellfish; fish eggs; ground fish meat products                                                                   |
| Eggs                      | NA                                                                                                                                                                                                                                                            |
| Dairy products            | Low-fat milk; full-fat milk; yogurt; cheese; ice cream                                                                                                                                                                                                        |
| Pulses and nuts           | Tofu (i.e., soybean curd); natto (i.e., fermented soybeans); tofu products; soy milk; peanuts and nuts                                                                                                                                                        |
| Vegetables                | Cabbage; cucumbers; lettuce; bitter melon; burdock; radishes; onions; carrots; pumpkins; tomatoes; eggplants; green peppers; broccoli; Chinese cabbage; green leafy vegetables; bean sprouts; edamame (i.e., immature soybeans) and peas; mushrooms; seaweeds |
| Potatoes                  | NA                                                                                                                                                                                                                                                            |
| Fruits                    | Strawberries; persimmons; citrus; kiwi fruit; water melons; pears; bananas; grapes; melons; peaches; apples                                                                                                                                                   |
| Confectioneries           | Rice crackers; Japanese sweets; candies, caramels, and chewing gum; Japanese bread with a sweet filling; snacks made from wheat flour; jellies; chocolates; biscuits and cookies; cakes                                                                       |
| Water                     | NA                                                                                                                                                                                                                                                            |
| Green tea                 | NA                                                                                                                                                                                                                                                            |
| Barley tea                | NA                                                                                                                                                                                                                                                            |
| Oolong tea                | NA                                                                                                                                                                                                                                                            |
| Black tea                 | NA                                                                                                                                                                                                                                                            |
| Coffee                    | NA                                                                                                                                                                                                                                                            |
| Soft drinks               | NA                                                                                                                                                                                                                                                            |
| Fruit and vegetable juice | NA                                                                                                                                                                                                                                                            |
| Alcoholic beverages       | Beer; sake; shochu (i.e., Japanese distilled beverages); wine; whiskey and other spirits                                                                                                                                                                      |
| Seasonings                | Sugar added to coffee and tea; salt for cooking; vegetable oils; sugar for cooking; salt for soup; soy sauce; jam for bread; fat spread for bread; mayonnaise and dressing                                                                                    |

NA, not applicable.

**Table S2.** Dietary variables and their assessment criteria used in the personalized nutrition system.

| Category and component                   | Category 1 (red cross) |                              | Category 2 (amber triangle) |             | Category 3 (blue circle) |               | Category 4 (amber triangle) |            | Category 5 (red cross) |            |
|------------------------------------------|------------------------|------------------------------|-----------------------------|-------------|--------------------------|---------------|-----------------------------|------------|------------------------|------------|
|                                          | Cutoff point           | Assessment                   | Cutoff point                | Assessment  | Cutoff point             | Assessment    | Cutoff point                | Assessment | Cutoff point           | Assessment |
| Weight status <sup>1</sup>               |                        |                              |                             |             |                          |               |                             |            |                        |            |
| Body mass index (kg/m <sup>2</sup> )     | <17                    | Moderate and severe thinness | ≥17 to <18.5                | Underweight | ≥18.5 to <25             | Normal weight | ≥25 to <30                  | Overweight | ≥30                    | Obese      |
| Eating pattern <sup>2</sup>              |                        |                              |                             |             |                          |               |                             |            |                        |            |
| Meal frequency (times/d)                 | <2.43 (= 17/7)         | Very low                     | ≥2.43 to <3                 | Low         | 3                        | Recommended   |                             |            |                        |            |
| Breakfast energy (% of total energy)     | <10                    | Very low                     | ≥10 to <20                  | Low         | ≥20                      | Recommended   |                             |            |                        |            |
| Lunch energy (% of total energy)         | <15                    | Very low                     | ≥15 to <25                  | Low         | ≥25 to ≤40               | Recommended   | >40 to <50                  | High       | ≥50                    | Very high  |
| Dinner energy (% of total energy)        | <20                    | Very low                     | ≥20 to <30                  | Low         | ≥30 to ≤45               | Recommended   | >45 to <55                  | High       | ≥55                    | Very high  |
| Snack energy (% of total energy)         |                        |                              |                             |             | ≤10                      | Recommended   | >10 to <20                  | High       | ≥20                    | Very high  |
| Breakfast quality (HEI-2015 score)       | <50                    | Very low                     | ≥50 to <70                  | Low         | ≥70                      | Recommended   |                             |            |                        |            |
| Lunch quality (HEI-2015 score)           | <50                    | Very low                     | ≥50 to <70                  | Low         | ≥70                      | Recommended   |                             |            |                        |            |
| Dinner quality (HEI-2015 score)          | <50                    | Very low                     | ≥50 to <70                  | Low         | ≥70                      | Recommended   |                             |            |                        |            |
| Snack quality (HEI-2015 score)           | <50                    | Very low                     | ≥50 to <70                  | Low         | ≥70                      | Recommended   |                             |            |                        |            |
| Total diet quality (HEI-2015 score)      | <50                    | Very low                     | ≥50 to <70                  | Low         | ≥70                      | Recommended   |                             |            |                        |            |
| Food <sup>3</sup>                        |                        |                              |                             |             |                          |               |                             |            |                        |            |
| Total fruits (cup Eq/1000 kcal)          | <0.4                   | Very low                     | ≥0.4 to <0.72               | Low         | ≥0.72                    | Recommended   |                             |            |                        |            |
| Total vegetables (cup Eq/1000 kcal)      | <0.55                  | Very low                     | ≥0.55 to <0.99              | Low         | ≥0.99                    | Recommended   |                             |            |                        |            |
| Dairy products (cup Eq/1000 kcal)        | <0.33                  | Very low                     | ≥0.33 to <0.59              | Low         | ≥0.59                    | Recommended   |                             |            |                        |            |
| Total protein foods (ounce Eq/1000 kcal) | <1.25                  | Very low                     | ≥1.25 to <2.25              | Low         | ≥2.25                    | Recommended   |                             |            |                        |            |
| Whole grains (ounce Eq/1000 kcal)        | <0.75                  | Very low                     | ≥0.75 to <1.35              | Low         | ≥1.35                    | Recommended   |                             |            |                        |            |
| Refined grains (ounce Eq/1000 kcal)      |                        |                              |                             |             | ≤2.05                    | Recommended   | >2.05 to ≤3.05              | High       | >3.05                  | Very high  |
| Nutrient <sup>4</sup>                    |                        |                              |                             |             |                          |               |                             |            |                        |            |
| Protein (g/d)                            | <EAR                   | Very low                     | ≥EAR to <RDA                | Low         | ≥RDA                     | Recommended   |                             |            |                        |            |
| Protein (% of total energy)              | <0.7 × LLDG            | Very low                     | ≥0.7 × LLDG to <LLDG        | Low         | LLDG to ULDG             | Recommended   | >ULDG to <1.3 × ULDG        | High       | ≥1.3 × ULDG            | Very high  |
| Fat (% of total energy)                  | <0.7 × LLDG            | Very low                     | ≥0.7 × LLDG to <LLDG        | Low         | LLDG to ULDG             | Recommended   | >ULDG to <1.3 × ULDG        | High       | ≥1.3 × ULDG            | Very high  |
| SFA (% of total energy)                  | <0.7 × LLDG            | Very low                     | ≥0.7 × LLDG to <LLDG        | Low         | LLDG to ULDG             | Recommended   | >ULDG to <1.3 × ULDG        | High       | ≥1.3 × ULDG            | Very high  |

|                                               |             |          |                           |     |                 |             |                         |      |             |           |
|-----------------------------------------------|-------------|----------|---------------------------|-----|-----------------|-------------|-------------------------|------|-------------|-----------|
| n-3 PUFA (g/d)                                | <0.7 × AI   | Very low | ≥0.7 × AI to<br><0.9 × AI | Low | ≥0.9 × AI       | Recommended |                         |      |             |           |
| n-6 PUFA (g/d)                                | <0.7 × AI   | Very low | ≥0.7 × AI to<br><0.9 × AI | Low | ≥0.9 × AI       | Recommended |                         |      |             |           |
| Ratio of PUFA + MUFA to SFA <sup>3</sup>      | <1.25       | Very low | ≥1.25 to <2.25            | Low | ≥2.25           | Recommended |                         |      |             |           |
| Carbohydrate (% of total energy)              | <0.7 × LLDG | Very low | ≥0.7 × LLDG to<br><LLDG   | Low | LLDG to<br>ULDG | Recommended | >ULDG to <1.3<br>× ULDG | High | ≥1.3 × ULDG | Very high |
| Added sugars (% of total energy) <sup>5</sup> |             |          |                           |     | <5              | Recommended | ≥5 to <10               | High | ≥10         | Very high |
| Alcohol (g/week) <sup>6</sup>                 |             |          |                           |     | ≤100            | Recommended | >100 to ≤200            | High | >200        | Very high |
| Dietary fiber (g/d)                           | <0.7 × LLDG | Very low | ≥0.7 × LLDG to<br><LLDG   | Low | ≥LLDG           | Recommended |                         |      |             |           |
| Sodium (NaCl g/d)                             |             |          |                           |     | <ULDG           | Recommended | ≥ULDG to <1.3<br>× ULDG | High | ≥1.3 × ULDG | Very high |
| Potassium (mg/d)                              | <0.7 × LLDG | Very low | ≥0.7 × LLDG to<br><LLDG   | Low | ≥LLDG           | Recommended |                         |      |             |           |
| Calcium (mg/d)                                | <EAR        | Very low | ≥EAR to <RDA              | Low | ≥RDA            | Recommended |                         |      |             |           |
| Magnesium (mg/d)                              | <EAR        | Very low | ≥EAR to <RDA              | Low | ≥RDA            | Recommended |                         |      |             |           |
| Phosphorus (mg/d)                             | <0.7 × AI   | Very low | ≥0.7 × AI to<br><0.9 × AI | Low | ≥0.9 × AI       | Recommended |                         |      |             |           |
| Iron (mg/d)                                   | <EAR        | Very low | ≥EAR to <RDA              | Low | ≥RDA            | Recommended |                         |      |             |           |
| Zinc (mg/d)                                   | <EAR        | Very low | ≥EAR to <RDA              | Low | ≥RDA            | Recommended |                         |      |             |           |
| Copper (mg/d)                                 | <EAR        | Very low | ≥EAR to <RDA              | Low | ≥RDA            | Recommended |                         |      |             |           |
| Manganese (mg/d)                              | <0.7 × AI   | Very low | ≥0.7 × AI to<br><0.9 × AI | Low | ≥0.9 × AI       | Recommended |                         |      |             |           |
| Vitamin A (μg/d)                              | <EAR        | Very low | ≥EAR to <RDA              | Low | ≥RDA            | Recommended |                         |      |             |           |
| Vitamin D (μg/d)                              | <0.7 × AI   | Very low | ≥0.7 × AI to<br><0.9 × AI | Low | ≥0.9 × AI       | Recommended |                         |      |             |           |
| Vitamin E (mg/d)                              | <0.7 × AI   | Very low | ≥0.7 × AI to<br><0.9 × AI | Low | ≥0.9 × AI       | Recommended |                         |      |             |           |
| Vitamin K (μg/d)                              | <0.7 × AI   | Very low | ≥0.7 × AI to<br><0.9 × AI | Low | ≥0.9 × AI       | Recommended |                         |      |             |           |
| Thiamin (mg/d)                                | <EAR        | Very low | ≥EAR to <RDA              | Low | ≥RDA            | Recommended |                         |      |             |           |
| Riboflavin (mg/d)                             | <EAR        | Very low | ≥EAR to <RDA              | Low | ≥RDA            | Recommended |                         |      |             |           |
| Niacin (mg/d)                                 | <EAR        | Very low | ≥EAR to <RDA              | Low | ≥RDA            | Recommended |                         |      |             |           |

|                         |           |          |                           |     |           |             |
|-------------------------|-----------|----------|---------------------------|-----|-----------|-------------|
| Vitamin B-6 (mg/d)      | <EAR      | Very low | ≥EAR to <RDA              | Low | ≥RDA      | Recommended |
| Vitamin B-12 (μg/d)     | <EAR      | Very low | ≥EAR to <RDA              | Low | ≥RDA      | Recommended |
| Folate (μg/d)           | <EAR      | Very low | ≥EAR to <RDA              | Low | ≥RDA      | Recommended |
| Pantothenic acid (mg/d) | <0.7 × AI | Very low | ≥0.7 × AI to<br><0.9 × AI | Low | ≥0.9 × AI | Recommended |
| Vitamin C (mg/d)        | <EAR      | Very low | ≥EAR to <RDA              | Low | ≥RDA      | Recommended |

AI, Adequate Intake; d, day; EAR, Estimated Average Requirement; Eq, equivalents; HEI-2015, Healthy Eating Index-2015; LLDG, lower limit of Tentative Dietary Goal for Preventing Lifestyle-related Diseases; MUFA, monounsaturated fatty acids; PUFA, polyunsaturated fatty acids; RDA, Recommended Dietary Allowance; SFA, saturated fatty acids; ULDG, upper limit of Tentative Dietary Goal for Preventing Lifestyle-related Diseases; y, years. <sup>1</sup> Cutoff values were determined by the World Health Organization's definition [36]. <sup>2</sup> Cutoff values were determined based on dietary intake data obtained from 639 Japanese adults aged 20-81 y [25,28]. <sup>3</sup> Cutoff values were based on the scoring system of Healthy Eating Index-2015 [8]: <50%, ≥50% to <90%, and ≥90% of the maximum score for "improvement strongly recommended", "improvement recommended", and "good; no change recommended", respectively. For dairy, the cutoff values on the HEI-2015 system were halved given the large difference in the reference values for calcium between Japan and the US (Estimated Average Requirement: 500-650 vs 800-1100 mg/day; Recommended Dietary Allowance: 600-800 vs 1000-1300 mg/day) [10,37]. <sup>4</sup> Cutoff values were based on dietary reference values (see Table S3) in the Japanese Dietary Reference Intakes [10], unless otherwise indicated. <sup>5</sup> Cutoff values were determined by the World Health Organization's definition [38]. <sup>6</sup> Cutoff values were based a combined analysis of 83 prospective cohort studies on the association between alcohol consumption and mortality [39].

**Table S3.** Dietary reference values used in the personalized nutrition system <sup>1</sup>.

|                                  | 18-29 y |     | 30-49 y |       |     |     | 50-64 y |       |     |     | 65-74 y |       |     |     | ≥75 y |       |     |     |      |       |
|----------------------------------|---------|-----|---------|-------|-----|-----|---------|-------|-----|-----|---------|-------|-----|-----|-------|-------|-----|-----|------|-------|
|                                  | EAR     | RDA | AI      | DG    | EAR | RDA | AI      | DG    | EAR | RDA | AI      | DG    | EAR | RDA | AI    | DG    | EAR | RDA | AI   | DG    |
| Men                              |         |     |         |       |     |     |         |       |     |     |         |       |     |     |       |       |     |     |      |       |
| Protein (g/d)                    | 50      | 65  | ---     | ---   | 50  | 65  | ---     | ---   | 50  | 65  | ---     | ---   | 50  | 60  | ---   | ---   | 50  | 60  | ---  | ---   |
| Protein (% of total energy)      | ---     | --- | ---     | 13-20 | --- | --- | ---     | 13-20 | --- | --- | ---     | 14-20 | --- | --- | ---   | 15-20 | --- | --- | ---  | 15-20 |
| Fat (% of total energy)          | ---     | --- | ---     | 20-30 | --- | --- | ---     | 20-30 | --- | --- | ---     | 20-30 | --- | --- | ---   | 20-30 | --- | --- | ---  | 20-30 |
| SFA (% of total energy)          | ---     | --- | ---     | ≤7    | --- | --- | ---     | ≤7    | --- | --- | ---     | ≤7    | --- | --- | ---   | ≤7    | --- | --- | ---  | ≤7    |
| n-3 PUFA (g/d)                   | ---     | --- | 2       | ---   | --- | --- | 2       | ---   | --- | --- | 2.2     | ---   | --- | --- | 2.2   | ---   | --- | --- | 2.1  | ---   |
| n-6 PUFA (g/d)                   | ---     | --- | 11      | ---   | --- | --- | 10      | ---   | --- | --- | 10      | ---   | --- | --- | 9     | ---   | --- | --- | 8    | ---   |
| Carbohydrate (% of total energy) | ---     | --- | ---     | 50-65 | --- | --- | ---     | 50-65 | --- | --- | ---     | 50-65 | --- | --- | ---   | 50-65 | --- | --- | ---  | 50-65 |
| Dietary fiber (g/d)              | ---     | --- | ---     | ≥21   | --- | --- | ---     | ≥21   | --- | --- | ---     | ≥21   | --- | --- | ---   | ≥20   | --- | --- | ---  | ≥20   |
| Sodium (NaCl g/d)                | ---     | --- | ---     | <7.5  | --- | --- | ---     | <7.5  | --- | --- | ---     | <7.5  | --- | --- | ---   | <7.5  | --- | --- | ---  | <7.5  |
| Potassium (mg/d)                 | ---     | --- | ---     | ≥3000 | --- | --- | ---     | ≥3000 | --- | --- | ---     | ≥3000 | --- | --- | ---   | ≥3000 | --- | --- | ---  | ≥3000 |
| Calcium (mg/d)                   | 650     | 800 | ---     | ---   | 600 | 750 | ---     | ---   | 600 | 750 | ---     | ---   | 600 | 750 | ---   | ---   | 600 | 700 | ---  | ---   |
| Magnesium (mg/d)                 | 280     | 340 | ---     | ---   | 310 | 370 | ---     | ---   | 310 | 370 | ---     | ---   | 290 | 350 | ---   | ---   | 270 | 320 | ---  | ---   |
| Phosphorus (mg/d)                | ---     | --- | 1000    | ---   | --- | --- | 1000    | ---   | --- | --- | 1000    | ---   | --- | --- | 1000  | ---   | --- | --- | 1000 | ---   |
| Iron (mg/d)                      | 6.5     | 7.5 | ---     | ---   | 6.5 | 7.5 | ---     | ---   | 6.5 | 7.5 | ---     | ---   | 6   | 7.5 | ---   | ---   | 6   | 7   | ---  | ---   |
| Zinc (mg/d)                      | 9       | 11  | ---     | ---   | 9   | 11  | ---     | ---   | 9   | 11  | ---     | ---   | 9   | 11  | ---   | ---   | 9   | 10  | ---  | ---   |
| Copper (mg/d)                    | 0.7     | 0.9 | ---     | ---   | 0.7 | 0.9 | ---     | ---   | 0.7 | 0.9 | ---     | ---   | 0.7 | 0.9 | ---   | ---   | 0.7 | 0.8 | ---  | ---   |
| Manganese (mg/d)                 | ---     | --- | 4       | ---   | --- | --- | 4       | ---   | --- | --- | 4       | ---   | --- | --- | 4     | ---   | --- | --- | 4    | ---   |
| Vitamin A (μg/d)                 | 600     | 850 | ---     | ---   | 650 | 900 | ---     | ---   | 650 | 900 | ---     | ---   | 600 | 850 | ---   | ---   | 550 | 800 | ---  | ---   |
| Vitamin D (μg/d)                 | ---     | --- | 8.5     | ---   | --- | --- | 8.5     | ---   | --- | --- | 8.5     | ---   | --- | --- | 8.5   | ---   | --- | --- | 8.5  | ---   |
| Vitamin E (mg/d)                 | ---     | --- | 6       | ---   | --- | --- | 6       | ---   | --- | --- | 7       | ---   | --- | --- | 7     | ---   | --- | --- | 6.5  | ---   |
| Vitamin K (μg/d)                 | ---     | --- | 150     | ---   | --- | --- | 150     | ---   | --- | --- | 150     | ---   | --- | --- | 150   | ---   | --- | --- | 150  | ---   |
| Thiamin (mg/d)                   | 1.2     | 1.4 | ---     | ---   | 1.2 | 1.4 | ---     | ---   | 1.1 | 1.3 | ---     | ---   | 1.1 | 1.3 | ---   | ---   | 1   | 1.2 | ---  | ---   |
| Riboflavin (mg/d)                | 1.3     | 1.6 | ---     | ---   | 1.3 | 1.6 | ---     | ---   | 1.2 | 1.5 | ---     | ---   | 1.2 | 1.5 | ---   | ---   | 1.1 | 1.3 | ---  | ---   |
| Niacin (mg/d)                    | 13      | 15  | ---     | ---   | 13  | 15  | ---     | ---   | 12  | 14  | ---     | ---   | 12  | 14  | ---   | ---   | 11  | 13  | ---  | ---   |
| Vitamin B-6 (mg/d)               | 1.1     | 1.4 | ---     | ---   | 1.1 | 1.4 | ---     | ---   | 1.1 | 1.4 | ---     | ---   | 1.1 | 1.4 | ---   | ---   | 1.1 | 1.4 | ---  | ---   |
| Vitamin B-12 (μg/d)              | 2       | 2.4 | ---     | ---   | 2   | 2.4 | ---     | ---   | 2   | 2.4 | ---     | ---   | 2   | 2.4 | ---   | ---   | 2   | 2.4 | ---  | ---   |
| Folate (μg/d)                    | 200     | 240 | ---     | ---   | 200 | 240 | ---     | ---   | 200 | 240 | ---     | ---   | 200 | 240 | ---   | ---   | 200 | 240 | ---  | ---   |
| Pantothenic acid (mg/d)          | ---     | --- | 5       | ---   | --- | --- | 5       | ---   | --- | --- | 6       | ---   | --- | --- | 6     | ---   | --- | --- | 6    | ---   |

|                                  |     |      |     |       |     |      |     |       |     |     |     |       |     |     |     |       |     |     |     |       |
|----------------------------------|-----|------|-----|-------|-----|------|-----|-------|-----|-----|-----|-------|-----|-----|-----|-------|-----|-----|-----|-------|
| Vitamin C (mg/d)                 | 85  | 100  | --- | ---   | 85  | 100  | --- | ---   | 85  | 100 | --- | ---   | 80  | 100 | --- | ---   | 80  | 100 | --- | ---   |
| Women                            |     |      |     |       |     |      |     |       |     |     |     |       |     |     |     |       |     |     |     |       |
| Protein (g/d)                    | 40  | 50   | --- | ---   | 40  | 50   | --- |       | 40  | 50  | --- | ---   | 40  | 50  | --- | ---   | 40  | 50  | --- | ---   |
| Protein (% of total energy)      | --- | ---  | --- | 13-20 | --- | ---  | --- | 13-20 | --- | --- | --- | 14-20 | --- | --- | --- | 15-20 | --- | --- | --- | 15-20 |
| Fat (% of total energy)          | --- | ---  | --- | 20-30 | --- | ---  | --- | 20-30 | --- | --- | --- | 20-30 | --- | --- | --- | 20-30 | --- | --- | --- | 20-30 |
| SFA (% of total energy)          | --- | ---  | --- | ≤7    | --- | ---  | --- | ≤7    | --- | --- | --- | ≤7    | --- | --- | --- | ≤7    | --- | --- | --- | ≤7    |
| n-3 PUFA (g/d)                   | --- | ---  | 1.6 | ---   | --- | ---  | 1.6 | ---   | --- | --- | 1.9 | ---   | --- | --- | 2   | ---   | --- | --- | 1.8 | ---   |
| n-6 PUFA (g/d)                   | --- | ---  | 8   | ---   | --- | ---  | 8   | ---   | --- | --- | 8   | ---   | --- | --- | 9   | ---   | --- | --- | 8   | ---   |
| Carbohydrate (% of total energy) | --- | ---  | --- | 50-65 | --- | ---  | --- | 50-65 | --- | --- | --- | 50-65 | --- | --- | --- | 50-65 | --- | --- | --- | 50-65 |
| Dietary fiber (g/d)              | --- | ---  | --- | ≥18   | --- | ---  | --- | ≥18   | --- | --- | --- | ≥18   | --- | --- | --- | ≥17   | --- | --- | --- | ≥17   |
| Sodium (NaCl g/d)                | --- | ---  | --- | <6.5  | --- | ---  | --- | <6.5  | --- | --- | --- | <6.5  | --- | --- | --- | <6.5  | --- | --- | --- | <6.5  |
| Potassium (mg/d)                 | --- | ---  | --- | ≥2600 | --- | ---  | --- | ≥2600 | --- | --- | --- | ≥2600 | --- | --- | --- | ≥2600 | --- | --- | --- | ≥2600 |
| Calcium (mg/d)                   | 550 | 650  | --- | ---   | 550 | 650  | --- | ---   | 550 | 650 | --- | ---   | 550 | 650 | --- | ---   | 500 | 600 | --- | ---   |
| Magnesium (mg/d)                 | 230 | 270  | --- | ---   | 240 | 290  | --- | ---   | 240 | 290 | --- | ---   | 230 | 280 | --- | ---   | 220 | 260 | --- | ---   |
| Phosphorus (mg/d)                | --- | ---  | 800 | ---   | --- | ---  | 800 | ---   | --- | --- | 800 | ---   | --- | --- | 800 | ---   | --- | --- | 800 | ---   |
| Iron (mg/d)                      | 8.5 | 10.5 | --- | ---   | 9   | 10.5 | --- | ---   | 9   | 11  | --- | ---   | 5   | 6   | --- | ---   | 5   | 6   | --- | ---   |
| Zinc (mg/d)                      | 7   | 8    | --- | ---   | 7   | 8    | --- | ---   | 7   | 8   | --- | ---   | 7   | 8   | --- | ---   | 6   | 8   | --- | ---   |
| Copper (mg/d)                    | 0.6 | 0.7  | --- | ---   | 0.6 | 0.7  | --- | ---   | 0.6 | 0.7 | --- | ---   | 0.6 | 0.7 | --- | ---   | 0.6 | 0.7 | --- | ---   |
| Manganese (mg/d)                 | --- | ---  | 3.5 | ---   | --- | ---  | 3.5 | ---   | --- | --- | 3.5 | ---   | --- | --- | 3.5 | ---   | --- | --- | 3.5 | ---   |
| Vitamin A (μg/d)                 | 450 | 650  | --- | ---   | 500 | 700  | --- | ---   | 500 | 700 | --- | ---   | 500 | 700 | --- | ---   | 450 | 650 | --- | ---   |
| Vitamin D (μg/d)                 | --- | ---  | 8.5 | ---   | --- | ---  | 8.5 | ---   | --- | --- | 8.5 | ---   | --- | --- | 8.5 | ---   | --- | --- | 8.5 | ---   |
| Vitamin E (mg/d)                 | --- | ---  | 5   | ---   | --- | ---  | 5.5 | ---   | --- | --- | 6   | ---   | --- | --- | 6.5 | ---   | --- | --- | 6.5 | ---   |
| Vitamin K (μg/d)                 | --- | ---  | 150 | ---   | --- | ---  | 150 | ---   | --- | --- | 150 | ---   | --- | --- | 150 | ---   | --- | --- | 150 | ---   |
| Thiamin (mg/d)                   | 0.9 | 1.1  | --- | ---   | 0.9 | 1.1  | --- | ---   | 0.9 | 1.1 | --- | ---   | 0.9 | 1.1 | --- | ---   | 0.8 | 0.9 | --- | ---   |
| Riboflavin (mg/d)                | 1   | 1.2  | --- | ---   | 1   | 1.2  | --- | ---   | 1   | 1.2 | --- | ---   | 1   | 1.2 | --- | ---   | 0.9 | 1   | --- | ---   |
| Niacin (mg/d)                    | 9   | 11   | --- | ---   | 10  | 12   | --- | ---   | 9   | 11  | --- | ---   | 9   | 11  | --- | ---   | 9   | 10  | --- | ---   |
| Vitamin B-6 (mg/d)               | 1   | 1.1  | --- | ---   | 1   | 1.1  | --- | ---   | 1   | 1.1 | --- | ---   | 1   | 1.1 | --- | ---   | 1   | 1.1 | --- | ---   |
| Vitamin B-12 (μg/d)              | 2   | 2.4  | --- | ---   | 2   | 2.4  | --- | ---   | 2   | 2.4 | --- | ---   | 2   | 2.4 | --- | ---   | 2   | 2.4 | --- | ---   |
| Folate (μg/d)                    | 200 | 240  | --- | ---   | 200 | 240  | --- | ---   | 200 | 240 | --- | ---   | 200 | 240 | --- | ---   | 200 | 240 | --- | ---   |
| Pantothenic acid (mg/d)          | --- | ---  | 5   | ---   | --- | ---  | 5   | ---   | --- | --- | 5   | ---   | --- | --- | 5   | ---   | --- | --- | 5   | ---   |
| Vitamin C (mg/d)                 | 85  | 100  | --- | ---   | 85  | 100  | --- | ---   | 85  | 100 | --- | ---   | 80  | 100 | --- | ---   | 80  | 100 | --- | ---   |

AI, Adequate Intake; d, day; DG, Tentative Dietary Goal for Preventing Lifestyle-related Diseases; EAR, Estimated Average Requirement; PUFA, polyunsaturated fatty acids; RDA, Recommended Dietary Allowance; SFA, saturated fatty acids; y, years. <sup>1</sup> All values are derived from the Japanese Dietary Reference Intakes [10].

## Here is a detailed summary of your diet.

Date of data analysis: 19/09/2021

We used numbers to show how you eat and compared them to the reference values. The reference value is the amount of food you should eat to prevent nutritional deficiencies and lifestyle-related diseases, based on your sex and age. The items marked with ○ are those that meet the reference values, so let's continue with the current way of eating. Items marked with △ are those that almost meet the reference, and those marked with × are those that are far from the reference. Let's start improving where we can.

Section 4 also shows major food sources of each of nutrients in Japanese. If you find that you are getting too much of a nutrient, you should reduce the frequency of eating the source food or the amount you eat at one time. For a nutrient judged to be low, it is recommended to increase the frequency of eating the source foods and the amount eaten at one time.

|                                       |             |
|---------------------------------------|-------------|
| ID                                    | ****        |
| Sex                                   | Male        |
| Date of birth                         | ****        |
| Date of data entry                    | 29/01/2021  |
| Age (years)                           | 35          |
| Body height (cm)                      | 166.0       |
| Body weight (kg)                      | 57.0        |
| BMI (kg/m <sup>2</sup> )              | 20.7        |
| Pregnancy/lactation                   | ---         |
| Estimated energy requirement (kcal/d) | 2700        |
| Reported energy intake (kcal/d)       | 1845        |
| Energy intake: energy requirement     | 0.68        |
| Dietary reporting status*             | Underreport |

\* Note: The amount of food calculated from your answers was much less than the amount of food that would maintain your weight. Although we have compensated for this, the results shown here may differ from the way you actually eat, so please consider them as "approximate results" only.

### Section 1: body weight

It is important to exercise as well as eat to manage your weight.

|                                    | Your BMI                      | Your grade                | Explanation                                                                                                                                                                                         |
|------------------------------------|-------------------------------|---------------------------|-----------------------------------------------------------------------------------------------------------------------------------------------------------------------------------------------------|
| <b>BMI</b><br>(kg/m <sup>2</sup> ) | <b>20.7</b><br>(Ref: 18.5-25) | <b>○</b><br>Normal weight | BMI is calculated as your weight (kg) divided by your height (m) squared, which indicates how healthy your weight is for your height. Measure and monitor your weight regularly in your daily life. |

BMI: body mass index. Assessed based on the WHO definition.

### Section 2: eating patterns

Improve the quality of your diet by reviewing how you eat foods and nutrients.

|                                              | Your diet                   | Your grade                | Explanation                                                                                                                                                                                                                                                                                                                                                                                                                                                                                                                                                                                                                                                                                                                                                                                                                                                                                                                                       |
|----------------------------------------------|-----------------------------|---------------------------|---------------------------------------------------------------------------------------------------------------------------------------------------------------------------------------------------------------------------------------------------------------------------------------------------------------------------------------------------------------------------------------------------------------------------------------------------------------------------------------------------------------------------------------------------------------------------------------------------------------------------------------------------------------------------------------------------------------------------------------------------------------------------------------------------------------------------------------------------------------------------------------------------------------------------------------------------|
| <b>Meal frequency</b><br>(times/d)           | <b>0.0</b><br>(Ref: 3)      | <b>×</b><br>Too little    | It has been scientifically proven that eating three meals (breakfast, lunch, and dinner) properly is associated with favorable nutrient intake patterns. Try not to skip meals whenever possible.                                                                                                                                                                                                                                                                                                                                                                                                                                                                                                                                                                                                                                                                                                                                                 |
| <b>Energy from breakfast</b><br>(%)          | <b>19.6</b><br>(Ref: ≥20)   | <b>△</b><br>A little less | The optimal distribution of energy (calories) among the three meals (breakfast, lunch, and dinner) has not yet been clarified. The graph shows the average energy allocation for people of the same gender and age as you. It is clear that eating three proper meals is associated with favorable nutrient intake patterns, and conversely, skipping meals (especially breakfast) is associated with unfavorable nutrient intake patterns. Not skipping meals is more important than the distribution of each.                                                                                                                                                                                                                                                                                                                                                                                                                                   |
| <b>Energy from lunch</b><br>(%)              | <b>16.5</b><br>(Ref: 25-40) | <b>△</b><br>A little less |                                                                                                                                                                                                                                                                                                                                                                                                                                                                                                                                                                                                                                                                                                                                                                                                                                                                                                                                                   |
| <b>Energy from dinner</b><br>(%)             | <b>42.3</b><br>(Ref: 30-45) | <b>○</b><br>Just right    |                                                                                                                                                                                                                                                                                                                                                                                                                                                                                                                                                                                                                                                                                                                                                                                                                                                                                                                                                   |
| <b>Energy from snacks</b><br>(%)             | <b>21.6</b><br>(Ref: <10)   | <b>×</b><br>Too much      | Snacking is not bad itself, but too much snacking can have a negative impact on the three meals (breakfast, lunch, and dinner). Just be careful not to eat or drink too much of anything that contains too much energy, and enjoy your snacks in moderation!                                                                                                                                                                                                                                                                                                                                                                                                                                                                                                                                                                                                                                                                                      |
| <b>Quality of breakfast</b><br>(Max: 100)    | <b>57.3</b><br>(Ref: ≥70)   | <b>△</b><br>A little low  | The "Healthy Eating Index-2015" is used to evaluate the quality of the diet. This is a 100-point scale that assesses the overall quality of the 10 most important foods and nutrients in the diet. The higher the score, the lower the risk of lifestyle-related diseases such as diabetes and heart disease. The 10 items are fruits, vegetables, dairy products, protein sources, whole grains, refined grains, sodium, saturated fatty acids, ratio of unsaturated to saturated fatty acids, and added sugars. For the average Japanese, the nutritional quality is highest for dinner, followed by lunch, breakfast, and snacks (see the graph). Here, the reference value was set at 70 points. This is a bit strict, but how was the quality of your meals? To improve the quality of your diet, let's check the above 10 items in Sections 3 and 4, and work on improving them one at a time, starting with the ones you think you can do. |
| <b>Quality of lunch</b><br>(Max: 100)        | <b>34.2</b><br>(Ref: ≥70)   | <b>×</b><br>Low           |                                                                                                                                                                                                                                                                                                                                                                                                                                                                                                                                                                                                                                                                                                                                                                                                                                                                                                                                                   |
| <b>Quality of dinner</b><br>(Max: 100)       | <b>62.5</b><br>(Ref: ≥70)   | <b>△</b><br>A little low  |                                                                                                                                                                                                                                                                                                                                                                                                                                                                                                                                                                                                                                                                                                                                                                                                                                                                                                                                                   |
| <b>Quality of snacks</b><br>(Max: 100)       | <b>13.7</b><br>(Ref: ≥70)   | <b>×</b><br>Low           |                                                                                                                                                                                                                                                                                                                                                                                                                                                                                                                                                                                                                                                                                                                                                                                                                                                                                                                                                   |
| <b>Quality of overall diet</b><br>(Max: 100) | <b>57.5</b><br>(Ref: ≥70)   | <b>△</b><br>A little low  |                                                                                                                                                                                                                                                                                                                                                                                                                                                                                                                                                                                                                                                                                                                                                                                                                                                                                                                                                   |

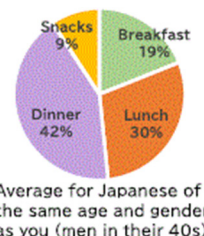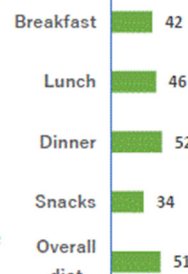

Reference values based on diet reported by 639 healthy Japanese aged 20-81 y.

(MDHQ feedback report 2/6)

© 2021 Kentaro Murakami

**Figure S1.** Part 2 (pages 2-4) of the dietary feedback report. This is a quantitative assessment of all dietary components. There are four sections in this part: Section 1: weight status; Section 2: eating patterns; Section 3: food group intake; Section 4: nutrient intake. All the variables assessed here as well as the assessment criteria are shown in Table S2. Here, only the second page of the translated version is shown; the original is in Japanese.



## For those who want to know more This is a summary of your food consumption.

Use this as a resource to help you figure out where you are getting too much of the foods to decrease, and where you can increase the amount of foods to increase.

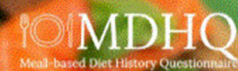

\* Note: The amount of food calculated from your answers was much less than the amount of food that would maintain your weight. Although we have compensated for this, the results shown here may differ from the way you actually eat, so please consider them as "approximate results" only.

Date of data analysis: 19/09/2021

|                                       |             |
|---------------------------------------|-------------|
| ID                                    | ****        |
| Sex                                   | Male        |
| Date of birth                         | ****        |
| Date of data entry                    | 29/01/2021  |
| Age (years)                           | 42          |
| Body height (cm)                      | 166.0       |
| Body weight (kg)                      | 57.0        |
| BMI (kg/m <sup>2</sup> )              | 20.7        |
| Pregnancy/lactation                   | ---         |
| Estimated energy requirement (kcal/d) | 2700        |
| Reported energy intake (kcal/d)       | 1845        |
| Energy intake: energy requirement     | 0.68        |
| Dietary reporting status *            | Underreport |

| Daily eating frequency |     |
|------------------------|-----|
| Breakfast              | 0.0 |
| Morning snack          | 0.4 |
| Lunch                  | 0.0 |
| Afternoon snack        | 1.0 |
| Dinner                 | 0.0 |
| Night snack            | 0.6 |
| Meals                  |     |
| Snacks                 | 2.0 |
| Total                  | 2.0 |

| Behavior              | Answer                   |
|-----------------------|--------------------------|
| Fatty meat            | Sometimes                |
| Taste strength        | A little weak            |
| Soy sauce (frequency) | Rarely                   |
| Soy sauce (amount)    | very small               |
| Amount of dishes      | same as eating out       |
| Amount of rice        | relatively large at home |

| Meat     | Answer |
|----------|--------|
| Grill    | 1/wk   |
| Stew     | 2-3/wk |
| Fry      | <1/wk  |
| Stir fry | 4-6/wk |
| Wafu     | 2-3/wk |

| Fish  | Answer |
|-------|--------|
| Raw   | 1/wk   |
| Grill | 2-3/wk |
| Stew  | 1/wk   |
| Fry   | 1/wk   |

| Food                             | Answer                  | Breakfast |     | Morning snack |     | Lunch  |     | Afternoon snack |     | Dinner |     | Night snack |     | Total |
|----------------------------------|-------------------------|-----------|-----|---------------|-----|--------|-----|-----------------|-----|--------|-----|-------------|-----|-------|
|                                  |                         | Answer    | g/d | Answer        | g/d | Answer | g/d | Answer          | g/d | Answer | g/d | Answer      | g/d |       |
| Rice                             |                         | 2/wk      | 71  | ---           | 0   | 1/wk   | 45  | ---             | 0   | 4/wk   | 164 | ---         | 0   | 279   |
| White rice                       | ---                     | ---       | 65  | ---           | 0   | ---    | 41  | ---             | 0   | ---    | 151 | ---         | 0   | 257   |
| Brown rice                       | Sometimes/20%           | ---       | 6   | ---           | 0   | ---    | 4   | ---             | 0   | ---    | 13  | ---         | 0   | 22    |
| Bread                            | Wholemeal bread: rarely | 4/wk      | 69  | ---           | 0   | 1/wk   | 20  | ---             | 0   | 2/wk   | 29  | ---         | 0   | 118   |
| Noodles                          |                         | 0/wk      | 0   | ---           | 0   | 3/wk   | 116 | ---             | 0   | 1/wk   | 36  | ---         | 0   | 153   |
| Wheat noodles                    | Rarely                  | ---       | 0   | ---           | 0   | ---    | 8   | ---             | 0   | ---    | 3   | ---         | 0   | 10    |
| Chinese noodles                  | Sometimes               | ---       | 0   | ---           | 0   | ---    | 46  | ---             | 0   | ---    | 14  | ---         | 0   | 60    |
| Instant noodles                  | Rarely                  | ---       | 0   | ---           | 0   | ---    | 1   | ---             | 0   | ---    | 0   | ---         | 0   | 2     |
| Spaghetti                        | Often                   | ---       | 0   | ---           | 0   | ---    | 59  | ---             | 0   | ---    | 20  | ---         | 0   | 78    |
| Buckwheat noodles                | Rarely                  | ---       | 0   | ---           | 0   | ---    | 2   | ---             | 0   | ---    | 1   | ---         | 0   | 3     |
| Breakfast cereals                |                         | 1/wk      | 13  | ---           | 0   | ---    | 0   | ---             | 0   | ---    | 0   | ---         | 0   | 13    |
| Miso soup                        |                         | 0/wk      | 0   | ---           | 0   | 0/wk   | 0   | ---             | 0   | 1/wk   | 38  | ---         | 0   | 38    |
| Pickled vegetables               |                         | 0/wk      | 0   | ---           | 0   | 0/wk   | 0   | ---             | 0   | 1/wk   | 5   | ---         | 0   | 5     |
| Meat                             |                         | 0/wk      | 0   | ---           | 0   | 3/wk   | 31  | ---             | 0   | 6/wk   | 96  | ---         | 0   | 127   |
| Liver                            | Never                   | ---       | 0   | ---           | 0   | ---    | 0   | ---             | 0   | ---    | 0   | ---         | 0   | 0     |
| Processed meat                   | Sometimes               | ---       | 0   | ---           | 0   | ---    | 5   | ---             | 0   | ---    | 6   | ---         | 0   | 11    |
| Beef                             | Rarely                  | ---       | 0   | ---           | 0   | ---    | 0   | ---             | 0   | ---    | 2   | ---         | 0   | 3     |
| Chicken                          | Often                   | ---       | 0   | ---           | 0   | ---    | 17  | ---             | 0   | ---    | 61  | ---         | 0   | 78    |
| Pork                             | Sometimes               | ---       | 0   | ---           | 0   | ---    | 8   | ---             | 0   | ---    | 27  | ---         | 0   | 36    |
| Fish and shellfish               |                         | 0/wk      | 0   | ---           | 0   | 0/wk   | 0   | ---             | 0   | 5/wk   | 94  | ---         | 0   | 94    |
| Small fish with bones            | Rarely                  | ---       | 0   | ---           | 0   | ---    | 0   | ---             | 0   | ---    | 0   | ---         | 0   | 0     |
| Dried fish                       | Never                   | ---       | 0   | ---           | 0   | ---    | 0   | ---             | 0   | ---    | 0   | ---         | 0   | 0     |
| Canned tuna                      | Rarely                  | ---       | 0   | ---           | 0   | ---    | 0   | ---             | 0   | ---    | 0   | ---         | 0   | 0     |
| Salmon                           | Sometimes               | ---       | 0   | ---           | 0   | ---    | 0   | ---             | 0   | ---    | 11  | ---         | 0   | 11    |
| White meat fish                  | Sometimes               | ---       | 0   | ---           | 0   | ---    | 0   | ---             | 0   | ---    | 25  | ---         | 0   | 25    |
| Oily fish                        | Sometimes               | ---       | 0   | ---           | 0   | ---    | 0   | ---             | 0   | ---    | 25  | ---         | 0   | 25    |
| Red meat fish                    | Sometimes               | ---       | 0   | ---           | 0   | ---    | 0   | ---             | 0   | ---    | 21  | ---         | 0   | 21    |
| Squid and octopus                | Rarely                  | ---       | 0   | ---           | 0   | ---    | 0   | ---             | 0   | ---    | 1   | ---         | 0   | 1     |
| Eel                              | Rarely                  | ---       | 0   | ---           | 0   | ---    | 0   | ---             | 0   | ---    | 0   | ---         | 0   | 0     |
| Shrimp and crab                  | Rarely                  | ---       | 0   | ---           | 0   | ---    | 0   | ---             | 0   | ---    | 1   | ---         | 0   | 1     |
| Shellfish                        | Sometimes               | ---       | 0   | ---           | 0   | ---    | 0   | ---             | 0   | ---    | 8   | ---         | 0   | 8     |
| Fish eggs                        | Never                   | ---       | 0   | ---           | 0   | ---    | 0   | ---             | 0   | ---    | 0   | ---         | 0   | 0     |
| Ground fish meat products        | Rarely                  | ---       | 0   | ---           | 0   | ---    | 0   | ---             | 0   | ---    | 1   | ---         | 0   | 1     |
| Eggs                             |                         | 0/wk      | 0   | ---           | 0   | 0/wk   | 0   | ---             | 0   | 1/wk   | 6   | ---         | 0   | 6     |
| Dairy products                   |                         | 5/wk      | 143 | 0/wk          | 0   | 0/wk   | 0   | 0/wk            | 0   | 1/wk   | 16  | 0/wk        | 0   | 159   |
| Low-fat milk                     | Rarely                  | ---       | 1   | ---           | 0   | ---    | 0   | ---             | 0   | ---    | 0   | ---         | 0   | 1     |
| Full-fat milk                    | Often                   | ---       | 80  | ---           | 0   | ---    | 0   | ---             | 0   | ---    | 9   | ---         | 0   | 89    |
| Yogurt                           | Sometimes               | ---       | 61  | ---           | 0   | ---    | 0   | ---             | 0   | ---    | 6   | ---         | 0   | 67    |
| Cheese                           | Rarely                  | ---       | 0   | ---           | 0   | ---    | 0   | ---             | 0   | ---    | 0   | ---         | 0   | 0     |
| Ice cream                        | Sometimes               | ---       | 0   | ---           | 0   | ---    | 0   | ---             | 0   | ---    | 1   | ---         | 0   | 1     |
| Pulses and nuts                  |                         | 1/wk      | 9   | ---           | 0   | 0/wk   | 0   | ---             | 0   | 3/wk   | 40  | ---         | 0   | 50    |
| Tofu (i.e., soybean curd)        | Sometimes               | ---       | 5   | ---           | 0   | ---    | 0   | ---             | 0   | ---    | 37  | ---         | 0   | 42    |
| Natto (i.e., fermented soybeans) | Sometimes               | ---       | 3   | ---           | 0   | ---    | 0   | ---             | 0   | ---    | 2   | ---         | 0   | 6     |
| Tofu products                    | Rarely                  | ---       | 0   | ---           | 0   | ---    | 0   | ---             | 0   | ---    | 1   | ---         | 0   | 1     |
| Soy milk                         | Never                   | ---       | 0   | ---           | 0   | ---    | 0   | ---             | 0   | ---    | 0   | ---         | 0   | 0     |
| Nuts (including peanuts)         | Sometimes               | ---       | 0   | ---           | 0   | ---    | 0   | ---             | 0   | ---    | 1   | ---         | 0   | 1     |

(Continues on next page)  
(MDHQ feedback report 5/6)  
© 2021 Kentaro Murakami

**Figure S2.** Part 3 (pages 5-6) of the dietary feedback report. This is a quantitative information on food intake for each eating occasion. This part includes information on dietary intake of 24 generic food groups and 88 food items (see Table S1). All intake values are shown for breakfast, morning snack, lunch, afternoon snack, dinner, and night snack separately, as well as for the total amount from all eating occasions. Here, only the fifth page of the translated version is shown; the original is in Japanese.



**Table S4.** Behavior change techniques (BCTs) used in the personalized nutrition system.

| BCT code <sup>1</sup> |         |         |     | BCT label                                                         | Selected/not selected | Dietary feedback report                                                                                                                                                                                                                                                                                                                                 | Other aspects (beyond the scope of this study) <sup>2</sup> |
|-----------------------|---------|---------|-----|-------------------------------------------------------------------|-----------------------|---------------------------------------------------------------------------------------------------------------------------------------------------------------------------------------------------------------------------------------------------------------------------------------------------------------------------------------------------------|-------------------------------------------------------------|
| MDHQ                  | Food4Me | CALO-RE | SC  |                                                                   |                       |                                                                                                                                                                                                                                                                                                                                                         |                                                             |
| 1                     | 1       | 1       | --- | Provide information on consequences of behavior in general        | Selected              | Part 2: descriptions on foods and nutrients                                                                                                                                                                                                                                                                                                             | ---                                                         |
| 2                     | 2       | 2       | --- | Provide information on consequences of behavior to the individual | Selected              | Part 1: descriptions on sodium, saturated fats, and added sugars                                                                                                                                                                                                                                                                                        | ---                                                         |
| 3                     | 3       | 3       | --- | Provide information about others' approval                        | Selected              | Part 1: personalized messages such as "You are doing really well!"                                                                                                                                                                                                                                                                                      | ---                                                         |
| 4                     | 4       | 13      | --- | Provide rewards contingent on successful behavior                 | Selected              | Part 1: personalized messages such as "Keep it as it is."                                                                                                                                                                                                                                                                                               | ---                                                         |
| ---                   | 5       | 14      | --- | Shaping                                                           | Not selected          | ---                                                                                                                                                                                                                                                                                                                                                     | ---                                                         |
| 5                     | 6       | 19      | --- | Provide feedback on performance                                   | Selected              | Parts 1-3: feedback report itself                                                                                                                                                                                                                                                                                                                       | ---                                                         |
| 6                     | 7       | 5       | --- | Goal setting (behavior)                                           | Selected              | Part 1: indicating "Big 3" (three most relevant components); Part 2: reference values of dietary intakes                                                                                                                                                                                                                                                | ---                                                         |
| 7                     | 8       | 6       | --- | Goal setting (outcome)                                            | Selected              | Part 2: reference value of weight status                                                                                                                                                                                                                                                                                                                | ---                                                         |
| 8                     | 9       | 9       | --- | Set graded tasks                                                  | Selected              | Part 1: personalized messages such as "Try to have as much amount of soups left as you can."                                                                                                                                                                                                                                                            | ---                                                         |
| 9                     | 10      | 10      | --- | Prompt review of behavioral goals                                 | Selected              | Parts 1 and 2: assessment (signal) for dietary variables                                                                                                                                                                                                                                                                                                | ---                                                         |
| 10                    | 11      | 11      | --- | Prompt review of outcome goals                                    | Selected              | Parts 1 and 2: assessment (signal) for weight status                                                                                                                                                                                                                                                                                                    | ---                                                         |
| 11                    | 12      | 17      | --- | Prompt self-monitoring of behavioral outcome                      | Selected              | Part 2: message on weight status (i.e., "Take regular weight measurements.")                                                                                                                                                                                                                                                                            | ---                                                         |
| 12                    | 13      | 7       | --- | Action planning                                                   | Selected              | Part 1: personalized messages on major sources of sodium, saturated fats, and added sugars such as "Your major food source of added sugars is confectioneries. As some of the confectioneries are high in added sugars, eat them in moderation and take care with your portion size. Swap confectioneries for fruit, low-fat dairy products, and nuts." | ---                                                         |
| 13                    | 14      | 8       | --- | Barrier identification or problem solving                         | Selected              | Part 1: personalized messages on major sources of sodium, saturated fats, and added sugars such as "Your major food source of saturated fat is meat. Trim the fat of meat before cooking or eating it. Reduce your intake of processed meat such as sausage and bacon. Swap meat for fish."                                                             | ---                                                         |
| 14                    | 15      | 26      | --- | Prompt practice                                                   | Selected              | Part 1: personalized messages on major sources of sodium, saturated fats, and added sugars such as "Try to use smaller amounts of salt-                                                                                                                                                                                                                 | ---                                                         |

|     |     |     |     |                                                               |              |                                                                                                                                                               |                                                                                                                                    |
|-----|-----|-----|-----|---------------------------------------------------------------|--------------|---------------------------------------------------------------------------------------------------------------------------------------------------------------|------------------------------------------------------------------------------------------------------------------------------------|
|     |     |     |     |                                                               |              | based seasonings. Swap salt-based seasonings for lemon juice, vinegar, spices, and herbs. Select low-salt seasonings whenever possible.”                      |                                                                                                                                    |
| --- | 16  | 29  | --- | Plan social support or social change                          | Not selected | ---                                                                                                                                                           | ---                                                                                                                                |
| 15  | 17  | --- | RD2 | Emphasize choice                                              | Selected     | Part 1: a general message “Let’s work on each one from where it seems possible.”                                                                              | ---                                                                                                                                |
| 16  | 18  | --- | RD1 | Tailor interactions appropriately                             | Selected     | Parts 1-3: feedback report created based on dietary intake data                                                                                               | ---                                                                                                                                |
| 17  | 19  | --- | RI1 | Assess current and past dietary behavior                      | Selected     | Not used                                                                                                                                                      | When repeated feedbacks are possible, the second feedback report will include dietary feedback in comparison with the first report |
| 18  | 20  | --- | RI2 | Assess current readiness and ability to change                | Selected     | Not used                                                                                                                                                      | Maybe assessed at baseline or screening                                                                                            |
| 19  | 21  | --- | RI3 | Assess past history of dietary change attempts                | Selected     | Not used                                                                                                                                                      | Could be done in repeated design                                                                                                   |
| 20  | 22  | --- | RI4 | Assess adverse reactions                                      | Selected     | Not used                                                                                                                                                      | Will be monitored throughout a trial                                                                                               |
| 21  | 23  | 21  | --- | Provide instruction on how to perform the behavior            | Selected     | Parts 1-2: provide tips on how to achieve dietary targets                                                                                                     | ---                                                                                                                                |
| 22  | 24  | 40  | --- | Stimulate anticipation of future rewards                      | Selected     | Not used                                                                                                                                                      | Encouraging continued participation and data collection; promising provision of dietary feedback                                   |
| --- | 25  | 27  | --- | Use of follow-up prompts                                      | Not selected | ---                                                                                                                                                           | ---                                                                                                                                |
| 23  | 26  | 20  | --- | Provide information on where and when to perform the behavior | Selected     | Part 1: personalized messages such as “Fruit can be included in your snack list and eaten after meals.”                                                       | ---                                                                                                                                |
| 24  | --- | 4   | --- | Provide formative information about others’ behavior          | Selected     | Part 2: showing the mean contribution of each meal to total energy and the mean diet quality score of general adults with same age and sex of the participant | ---                                                                                                                                |

---

CALO-RE, Coventry, Aberdeen, and London-Refined; RD, general aspects of the interaction (R) focusing on delivery of the intervention (D); RI, general aspects of the interaction (R) focusing on information gathering (I); SC, smoking cessation. <sup>1</sup> These are BCT codes used in each of the previous studies [11,17,18], as well as in the present study (MDHQ column), which are just shown for future references. <sup>2</sup> Will be considered for a future intervention trial.

**Table S5.** Acceptability scores of the MDHQ feedback report according to dietary reporting status, whether the feedback report was printed, and time spent reading the feedback report <sup>1</sup>.

| Variable                                 | Dietary reporting status                     |                                             | Whether the MDHQ feedback report was printed |                       | Time spent reading the MDHQ feedback report |                                 |
|------------------------------------------|----------------------------------------------|---------------------------------------------|----------------------------------------------|-----------------------|---------------------------------------------|---------------------------------|
|                                          | Implausible <sup>2</sup><br>( <i>n</i> = 65) | Plausible <sup>3</sup><br>( <i>n</i> = 190) | No ( <i>n</i> = 133)                         | Yes ( <i>n</i> = 122) | Less than 20 min ( <i>n</i> = 162)          | 20 min or more ( <i>n</i> = 93) |
| Total score                              | 4.1 ± 0.4                                    | 4.3 ± 0.4 **                                | 4.2 ± 0.4                                    | 4.3 ± 0.4 **          | 4.2 ± 0.4                                   | 4.3 ± 0.4 *                     |
| The report is believable                 | 4.0 ± 0.6                                    | 4.2 ± 0.7                                   | 4.1 ± 0.6                                    | 4.2 ± 0.6             | 4.1 ± 0.7                                   | 4.2 ± 0.5 *                     |
| The report is relevant                   | 4.1 ± 0.7                                    | 4.4 ± 0.6 **                                | 4.2 ± 0.7                                    | 4.4 ± 0.6 *           | 4.2 ± 0.7                                   | 4.4 ± 0.6 *                     |
| The report is interesting                | 4.4 ± 0.6                                    | 4.7 ± 0.5 **                                | 4.5 ± 0.6                                    | 4.7 ± 0.5 *           | 4.5 ± 0.6                                   | 4.7 ± 0.5                       |
| The report is logical                    | 4.1 ± 0.7                                    | 4.3 ± 0.6 **                                | 4.2 ± 0.6                                    | 4.4 ± 0.6 *           | 4.2 ± 0.6                                   | 4.4 ± 0.7                       |
| The report is understandable             | 4.3 ± 0.7                                    | 4.3 ± 0.6                                   | 4.3 ± 0.7                                    | 4.3 ± 0.6             | 4.3 ± 0.7                                   | 4.3 ± 0.6                       |
| The report is well formulated            | 4.3 ± 0.7                                    | 4.5 ± 0.7                                   | 4.4 ± 0.7                                    | 4.4 ± 0.7             | 4.4 ± 0.7                                   | 4.5 ± 0.7                       |
| The report is complete                   | 4.3 ± 0.7                                    | 4.5 ± 0.6 **                                | 4.4 ± 0.7                                    | 4.5 ± 0.6             | 4.4 ± 0.7                                   | 4.6 ± 0.6 *                     |
| The report is too long                   | 3.2 ± 1.0                                    | 3.3 ± 1.1                                   | 3.2 ± 1.0                                    | 3.3 ± 1.1             | 3.3 ± 1.0                                   | 3.2 ± 1.1                       |
| The report is personal                   | 4.3 ± 0.8                                    | 4.5 ± 0.7 *                                 | 4.3 ± 0.8                                    | 4.5 ± 0.6 *           | 4.4 ± 0.8                                   | 4.5 ± 0.6                       |
| The report is correct                    | 3.7 ± 0.8                                    | 4.0 ± 0.7 **                                | 3.8 ± 0.7                                    | 4.0 ± 0.7 *           | 3.8 ± 0.7                                   | 4.0 ± 0.7 *                     |
| I will use the report                    | 4.2 ± 0.8                                    | 4.3 ± 0.7                                   | 4.2 ± 0.7                                    | 4.4 ± 0.7 *           | 4.2 ± 0.7                                   | 4.5 ± 0.6 **                    |
| The report will help me to eat healthier | 4.5 ± 0.6                                    | 4.5 ± 0.6                                   | 4.4 ± 0.6                                    | 4.6 ± 0.6 *           | 4.5 ± 0.6                                   | 4.6 ± 0.5                       |

MDHQ, Meal-based Diet History Questionnaire. <sup>1</sup> Values are means ± standard deviations. Acceptability scores range from 1 (“strongly disagree”) to 5 (“strongly agree”), except for the item “The report is too long” for which the score is assigned vice versa. The total score was calculated as the average of all 12 items. Mean values between the two categories of each variable were compared using independent *t*-test: \* *p* < 0.05; \*\* *p* < 0.01. <sup>2</sup> Including 63 under-reporters and 2 over-reporters. Under- and over-reporters were defined as participants with the ratio of reported energy intake to estimated energy requirement of <0.7 and >1.3, respectively. <sup>3</sup> Defined as participants with the ratio of reported energy intake to estimated energy requirement of 0.7 to 1.3.

**Table S6.** Acceptability scores of the MDHQ feedback report according to age, weight status, and diet quality <sup>1</sup>.

| Variable                                 | Age <sup>2</sup>     |                    | Weight status <sup>3</sup> |                            |                         | Diet quality <sup>4</sup> |                     |
|------------------------------------------|----------------------|--------------------|----------------------------|----------------------------|-------------------------|---------------------------|---------------------|
|                                          | Younger<br>(n = 129) | Older<br>(n = 126) | Underweight<br>(n = 27)    | Normal weight<br>(n = 183) | Overweight<br>(n = 45)  | Lower<br>(n = 128)        | Higher<br>(n = 127) |
| Total score                              | 4.2 ± 0.4            | 4.3 ± 0.4          | 4.2 ± 0.5                  | 4.3 ± 0.4                  | 4.2 ± 0.5               | 4.2 ± 0.4                 | 4.3 ± 0.4           |
| The report is believable                 | 4.1 ± 0.6            | 4.2 ± 0.6          | 4.1 ± 0.7                  | 4.1 ± 0.6                  | 4.1 ± 0.6               | 4.1 ± 0.6                 | 4.1 ± 0.6           |
| The report is relevant                   | 4.2 ± 0.7            | 4.4 ± 0.6          | 4.3 ± 0.7                  | 4.3 ± 0.6                  | 4.2 ± 0.7               | 4.3 ± 0.7                 | 4.3 ± 0.6           |
| The report is interesting                | 4.6 ± 0.6            | 4.6 ± 0.5          | 4.6 ± 0.6                  | 4.6 ± 0.5                  | 4.6 ± 0.5               | 4.5 ± 0.6                 | 4.6 ± 0.5           |
| The report is logical                    | 4.2 ± 0.6            | 4.4 ± 0.7          | 4.3 ± 0.6                  | 4.3 ± 0.7                  | 4.2 ± 0.6               | 4.2 ± 0.6                 | 4.3 ± 0.7           |
| The report is understandable             | 4.2 ± 0.7            | 4.4 ± 0.6 **       | 3.9 ± 0.7 <sup>a</sup>     | 4.4 ± 0.6 <sup>b</sup>     | 4.2 ± 0.7 <sup>ab</sup> | 4.3 ± 0.6                 | 4.3 ± 0.7           |
| The report is well formulated            | 4.4 ± 0.7            | 4.4 ± 0.7          | 4.1 ± 0.8 <sup>a</sup>     | 4.4 ± 0.7 <sup>b</sup>     | 4.4 ± 0.6 <sup>ab</sup> | 4.4 ± 0.7                 | 4.4 ± 0.7           |
| The report is complete                   | 4.5 ± 0.7            | 4.5 ± 0.6          | 4.4 ± 0.6                  | 4.5 ± 0.6                  | 4.4 ± 0.7               | 4.5 ± 0.6                 | 4.5 ± 0.7           |
| The report is too long                   | 3.1 ± 1.1            | 3.4 ± 1.0 *        | 2.8 ± 1.1 <sup>a</sup>     | 3.3 ± 1.0 <sup>ab</sup>    | 3.5 ± 1.2 <sup>b</sup>  | 3.2 ± 1.0                 | 3.3 ± 1.1           |
| The report is personal                   | 4.4 ± 0.7            | 4.4 ± 0.7          | 4.4 ± 0.7                  | 4.5 ± 0.7                  | 4.3 ± 0.9               | 4.4 ± 0.8                 | 4.5 ± 0.7           |
| The report is correct                    | 3.8 ± 0.7            | 4.0 ± 0.7          | 4.0 ± 0.7                  | 3.9 ± 0.7                  | 4.0 ± 0.7               | 3.9 ± 0.7                 | 4.0 ± 0.7           |
| I will use the report                    | 4.3 ± 0.7            | 4.3 ± 0.7          | 4.3 ± 0.8                  | 4.3 ± 0.6                  | 4.4 ± 0.8               | 4.3 ± 0.7                 | 4.4 ± 0.7           |
| The report will help me to eat healthier | 4.5 ± 0.6            | 4.5 ± 0.6          | 4.6 ± 0.6 <sup>ab</sup>    | 4.6 ± 0.5 <sup>a</sup>     | 4.3 ± 0.7 <sup>b</sup>  | 4.5 ± 0.6                 | 4.6 ± 0.6           |

MDHQ, Meal-based Diet History Questionnaire. <sup>1</sup> Values are means ± standard deviations. Acceptability scores range from 1 (“strongly disagree”) to 5 (“strongly agree”), except for the item “The report is too long” for which the score is assigned vice versa. The total score was calculated as the average of all 12 items. Mean values between the two categories of age and diet quality were compared using independent *t*-test: \* *p* < 0.05; \*\* *p* < 0.01. For weight status, mean values between the three categories were compared using analysis of variance. When the overall *p* from analysis of variance was <0.05, Bonferroni’s post hoc test was performed; values within each variable with unlike superscript letters are significantly different (*p* < 0.05). <sup>2</sup> Two categories were created by median age (48 years). <sup>3</sup> Weight status was categorized on the basis of body mass index (in kg/m<sup>2</sup>): underweight (<18.5), normal weight (≥18.5 to <25), or overweight (≥25). <sup>4</sup> Diet quality was assessed by the Healthy Eating Index-2015 total score; two categories were created by median score (56.8).
